# Supplementary material for: Einfluss des Manchester Triage Systems auf relevante Outcomes
Source: Springer Nature journal article supplement (doi:10.1007/s41906-022-1214-z), 2022-02-01
Supplement: MOESM1 [file 20132644]

## Literatur

### zum Beitrag „Einfluss des Manchester Triage Systems auf relevante Outcome“

von Rebecca Knoll, Jan Daniel Kellerer

*PflegeZeitschrift* (75) 3/2022, S. 54-57

Anziliero F., Dal Soler B.E., Silva B.A.d., Tancini T. & Beghetto M.G. (2017) Sistema Manchester: tempo empregado na classificação de risco e prioridade para atendimento em uma emergência. *Revista gaucha de enfermagem*, 37(4), e64753.

Bettany-Saltikov J. & McSherry R. (2016) How to do a systematic literature review in nursing: A step-by-step guide. 2nd ed. McGraw-Hill Education Open University Press, London.

Brettschneider C., Lühmann D. & Raspe H. (2011) Informative value of Patient Reported Outcomes (PRO) in Health Technology Assessment (HTA). *GMS health technology assessment*, 7, Doc01.

Brouns S.H.A., Mignot-Evers L., Derkx F., Lambooi S.L., Dieleman J.P. & Haak H.R. (2019) Performance of the Manchester triage system in older emergency department patients: a retrospective cohort study. *BMC emergency medicine*, 19(1), 3.

Bürgi U., Christ M., Hogan B., Behringer W. & Dodt C. (2013) Länderübergreifende Zusammenarbeit in der Notfallmedizin. *Schweizerische Ärztezeitung*, 94(50), 1899–1900.

Cella D., Hahn E.A., Jensen S.E., Butt Z., Nowinski C.J. & Rothrock N., et al. (2015) Patient-Reported Outcomes in Performance Measurement, Research Triangle Park (NC).

Dalwai M.K., Tayler-Smith K., Trelles M., Jemmy J.-P., Maikéré J. & Twomey M., et al. (2013) Implementation of a triage score system in an emergency room in Timergara, Pakistan. *Public health action*, 3(1), 43–45.

Dekkers O.M., Vandenbroucke J.P., Cevallos M., Renehan A.G., Altman D.G. & Egger M. (2019) COSMOS-E: Guidance on conducting systematic reviews and meta-analyses of observational studies of etiology. *PLoS medicine*, 16(2), e1002742.

DiCenso A., Guyatt G. & Ciliska D. (2005) Evidence-based nursing: A guide to clinical practice. 2nd ed. Elsevier Mosby, St. Louis, Mo.

Forsman B., Forsgren S. & Carlström E.D. (2012) Nurses working with Manchester triage – The impact of experience on patient security. *Australasian Emergency Nursing Journal*, 15(2), 100–107.

Grossetta Nardini H.K. & Wang L. (2021) The Yale MeSH Analyzer. <https://mesh.med.yale.edu/>, Zugriff am 16. November 2021.

Guedes H.M., Martins J.C.A. & Chianca T.C.M. (2015) Predictive value of the Manchester Triage System: evaluation of patients' clinical outcomes. *Revista brasileira de enfermagem*, 68(1), 40-5, 45-51.

Guedes H.M., Souza K.M., Lima P.d.O., Martins J.C.A. & Chianca T.C.M. (2015) Relationship between complaints presented by emergency patients and the final outcome. *Revista latino-americana de enfermagem*, 23(4), 587–594.

Guedes H.M., Araújo F.A., Domingos P.J., Martins J.C.A. & Chianca T.C.M. (2017) Outcome assessment of patients classified through the Manchester Triage System in emergency units in Brazil and Portugal. *Investigacion y educacion en enfermeria*, 35(2), 174–181.

International Council of Nurses (2008) Nursing Care Continuum Framework and Competencies. [https://sigafsia.ch/files/user\\_upload/07\\_ICN\\_Nursing\\_Care\\_Continuum\\_Framework\\_and\\_Competerencies.pdf](https://sigafsia.ch/files/user_upload/07_ICN_Nursing_Care_Continuum_Framework_and_Competerencies.pdf).

Kiblboeck D., Steinrueck K., Nitsche C., Lang W., Kellermair J. & Blessberger H., et al. (2020) Evaluation of the Manchester triage system for patients with acute coronary syndrome. *Wiener klinische Wochenschrift*, 132(11-12), 277–282.

Kovacevic S., Kurbos K. & Binder D. (2011) Ersteinschätzung in der Notaufnahme nach dem Manchester Triage System (MTS). [https://www.uniklinikumgraz.at/fileadmin/media/lkh-univ-klinikum-graz/Uniklinikum/Partner\\_und\\_Zuweiser/MTS/Dokumente/Gsund\\_Artikel\\_2010.pdf](https://www.uniklinikumgraz.at/fileadmin/media/lkh-univ-klinikum-graz/Uniklinikum/Partner_und_Zuweiser/MTS/Dokumente/Gsund_Artikel_2010.pdf), Zugriff am 10. Oktober 2021.

Krey J. (2016) Klinische Ersteinschätzung in der Notaufnahme. Vergleichende Evaluation 4 international bestehender Triage-systeme. *Medizinische Klinik, Intensivmedizin und Notfallmedizin*, 111(2), 124–133.

Lähdet E.F., Suserud B.-O., Jonsson A. & Lundberg L. (2009) Analysis of triage worldwide. *Emergency nurse : the journal of the RCN Accident and Emergency Nursing Association*, 17(4), 16–19.

Liu Y., Avant K.C., Aunguroch Y., Zhang X.-Y. & Jiang P. (2014) Patient outcomes in the field of nursing: A concept analysis. *International Journal of Nursing Sciences*, 1(1), 69–74.

Martins H.M.G., Cuña L.M.D.C.D. & Freitas P. (2009) Is Manchester (MTS) more than a triage system? A study of its association with mortality and admission to a large Portuguese hospital. *Emergency medicine journal : EMJ*, 26(3), 183–186.

Nguyen-Tat M., Cornelius C., Hoffman A., Tresch A., Krey J. & Kiesslich R., et al. (2018) Das Manchester Triage System (MTS): Ein Score für das notfallmedizinische Management von Patienten mit akuter gastrointestinaler Blutung. *Zeitschrift für Gastroenterologie*.

Nishi F.A., Polak C. & Cruz D.d.A.L.M.d. (2018) Sensitivity and specificity of the Manchester Triage System in risk prioritization of patients with acute myocardial infarction who present with chest pain. *European journal of cardiovascular nursing : journal of the Working Group on Cardiovascular Nursing of the European Society of Cardiology*, 17(7), 660–666.

Paiva L., Providencia R., Faustino A., Barra S., Botelho A. & Leitao-Marques A.M. (2012) Manchester triage in acute pulmonary embolism: can it unmask the grand impersonator? *Emergency medicine journal : EMJ*, 29(12), e6.

Pereira M., Guedes H., Oliveira L. & Martins J. (2017) Association between the Manchester Triage System and the final outcome in stroke patients. *Revista de Enfermagem Referência, IV Série*(13), 93–102.

Raich M., Lorenzoni N., Angerer S., Nöhammer E. & Stummer H. (2019) Nurses' experiences with the Implementation of a Manchester Triage System in an Emergency Department. *European Journal of Public Health*, 29(Supplement\_4).

Scherer M., Lühmann D., Kazek A., Hansen H. & Schäfer I. (2017) Patients Attending Emergency Departments. *Deutsches Arzteblatt international*, 114(39), 645–652.

Stacey D., Légaré F. & Brière N. (2016) Engaging clinical teams in an interprofessional approach to shared decision making. In: Glyn Elwyn, Adrian Edwards, Rachel Thompson (Hrsg.) *Shared Decision Making in Health Care*. Oxford University Press, S. 64–69.

Steiner D., Renetseder F., Kutz A., Haubitz S., Faessler L. & Anderson J.B., et al. (2016) Performance of the Manchester Triage System in Adult Medical Emergency Patients: A Prospective Cohort Study. *The Journal of emergency medicine*, 50(4), 678–689.

Storm-Versloot M.N., Vermeulen H., van Lammeren N., Luitse J.S.K. & Goslings J.C. (2014) Influence of the Manchester triage system on waiting time, treatment time, length of stay and patient satisfaction; a before and after study. *Emergency medicine journal : EMJ*, 31(1), 13–18.

Subbe C.P., Kellett J., Whitaker C.J., Jishi F., White A. & Price S., et al. (2014) A pragmatic triage system to reduce length of stay in medical emergency admission: feasibility study and health economic analysis. *European journal of internal medicine*, 25(9), 815–820.

van der Wulp I., Schrijvers A.J.P. & van Stel H.F. (2009) Predicting admission and mortality with the Emergency Severity Index and the Manchester Triage System: a retrospective observational study. *Emergency medicine journal : EMJ*, 26(7), 506–509.

van Veen M., Steyerberg E.W., Lettinga L., Ruige M., van Meurs A.H.J. & van der Lei J., et al. (2011) Safety of the Manchester Triage System to identify less urgent patients in paediatric emergency care: a prospective observational study. *Archives of disease in childhood*, 96(6), 513–518.

Velentgas, Priscilla T.; Dreyer, Nancy A.; Nourjah, Parivash; Smith, Scott R.; Torchia, Marion (eds.) (2013) *Developing a protocol for observational comparative effectiveness research: A user's guide*. Agency for Healthcare Research and Quality, Rockville, MD.
