# Supplementary material for: Einfluss des Manchester Triage Systems auf relevante Outcomes
Source: Springer Nature journal article supplement (doi:10.1007/s41906-022-1214-z), 2022-02-01
Supplement: MOESM2 [file 20132644]

# Tabelle 1

## zum Beitrag „Einfluss des Manchester Triage Systems auf relevante Outcome“

von Rebecca Knoll, Jan Daniel Kellerer

PflegeZeitschrift (75) 3/2022, S. 54-57

Tabelle 1: Deskription der inkludierten Studien

| Autor*in (Jahr)<br>Land            | Ziel                                                                                                                                                         | Studiendesign,<br>Stichprobe                 | Ergebnisse                                                                                                                                                                                                                                                                                                                                                                                                            |
|------------------------------------|--------------------------------------------------------------------------------------------------------------------------------------------------------------|----------------------------------------------|-----------------------------------------------------------------------------------------------------------------------------------------------------------------------------------------------------------------------------------------------------------------------------------------------------------------------------------------------------------------------------------------------------------------------|
| Brouns et al. (2019)<br>NL         | Einfluss<br>MTS-Klassifizierung auf <i>Ressourcennutzung</i> ,<br><i>Aufenthaltsdauer</i> in der Notaufnahme, <i>Hospitalisierung</i> ,<br><i>Mortalität</i> | retrospektive<br>Kohortenstudie<br>n=20875   | Wartezeit↑ in der Notaufnahme bei Priorisierung↑ <sup>(††)</sup><br>Priorisierung↑ und Ressourcennutzung↑ <sup>(†‡‡)</sup><br>Hospitalisierungsdauer↓ bei Patienten ≥65a und Dringlichkeit↑ <sup>(††)</sup><br>Hospitalisierungsrisiko↑ und Priorisierung↑ <sup>(‡‡‡)</sup><br>Intensivstationäre Aufnahme↑ und Priorisierung↑ (Alter ≥65a) <sup>(‡‡‡)</sup><br>Mortalitätsrisiko↑ und Priorisierung↑ <sup>(††)</sup> |
| Pereira et al. (2017)<br>POR       | Zusammenhang<br>MTS-Klassifizierung und <i>Entlassung</i> aus Notaufnahme,<br><i>Hospitalisierung</i> , <i>Mortalität</i>                                    | prospektive<br>Beobachtungsstudie<br>n=864   | Entlassungen am häufigsten in Kategorie (Kat.) gelb <sup>(††)</sup><br>Mortalität↑ und Priorisierung↑ (Kat. orange und rot) <sup>(††)</sup><br>Hospitalisierung↑ und Priorisierung↑ (Kat. orange und rot) <sup>(††)</sup>                                                                                                                                                                                             |
| Guedes et al. (2017)<br>BRA & POR  | Zusammenhang<br>MTS-Klassifizierung und <i>stationäre Aufenthaltsdauer</i> ,<br><i>Mortalität</i>                                                            | retrospektive<br>Kohortenstudie<br>n=314080  | Priorisierung↑ und stationäre Aufenthaltsdauer↑ <sup>(‡‡‡)</sup><br>Priorisierung↑ Mortalitätsrisiko↑ <sup>(‡‡‡)</sup><br>Mortalität↑↑ bei Priorisierung↑↑ (Kat. rot) <sup>(‡‡‡)</sup>                                                                                                                                                                                                                                |
| Nguyen-Tat et al.<br>(2017)<br>GER | Zusammenhang<br>MTS-Klassifizierung und <i>stationäre Aufenthaltsdauer</i> ,<br><i>Mortalität</i> , <i>Prävalenz akute GI-Blutungen</i>                      | retrospektive<br>Beobachtungsstudie<br>n=284 | Priorisierung und stationäre Aufenthaltsdauer <sup>(‡‡)</sup><br>Stationäre Aufenthaltsdauer und Priorisierung↑ (Kat. orange und rot) <sup>(‡‡)</sup><br>Priorisierung und Hospitalisierungswahrscheinlichkeit <sup>(†)</sup><br>Aktive GI-Blutungen↑ und Priorisierung↑ (Kat. orange und rot) <sup>(‡‡‡)</sup>                                                                                                       |

| Autor*in (Jahr)<br>Land                       | Ziel                                                                                                                                                                                                                                                                              | Studiendesign,<br>Stichprobe                                       | Ergebnisse                                                                                                                                                                                                                                                                                                                                                                                                                                           |
|-----------------------------------------------|-----------------------------------------------------------------------------------------------------------------------------------------------------------------------------------------------------------------------------------------------------------------------------------|--------------------------------------------------------------------|------------------------------------------------------------------------------------------------------------------------------------------------------------------------------------------------------------------------------------------------------------------------------------------------------------------------------------------------------------------------------------------------------------------------------------------------------|
| Anziliero et al.<br>(2016)<br>BRA             | Zusammenhang<br>MTS-Klassifizierung und <i>Aufenthaltsdauer in der<br/>Notaufnahme, Mortalität</i>                                                                                                                                                                                | retrospektive<br>Kohortenstudie<br>n=139556                        | Stationäre Aufenthaltsdauer↓ bei Priorisierung↑ (Kategorien orange und rot) <sup>(††)</sup><br>Mortalität↑ bei Priorisierung Kat. rot vs. Kat. orange <sup>(††)</sup>                                                                                                                                                                                                                                                                                |
| Guedes, Martins &<br>Chianca<br>(2015)<br>BRA | Prädiktive Validität des MTS bzgl. <i>TISS-28-Score,<br/>Hospitalisierung, stationäre Aufenthaltsdauer, Mortalität</i>                                                                                                                                                            | prospektive<br>Beobachtungsstudie<br>n=577                         | Priorisierung↑ und TISS-28-Score↑ <sup>(‡‡)</sup><br>Priorisierung↑↓ und stationäre Aufenthaltsdauer↑↓ <sup>(‡‡)</sup><br>Hospitalisierung >5d↑ bei Priorisierung↑↑ (Kat. rot) <sup>(‡‡)</sup><br>Priorisierung↑ und Mortalitätsrisiko↑ <sup>(‡‡)</sup>                                                                                                                                                                                              |
| Guedes et al. (2015)<br>BRA                   | Zusammenhang<br>MTS-Klassifizierung und <i>Mortalität, Hospitalisierung</i>                                                                                                                                                                                                       | prospektive Kohortenstudie<br>n=509                                | Mortalität↑↑ bei Priorisierung↑↑ (Kat. rot) <sup>(‡‡)</sup><br>Priorisierung↓↓ (Kat. grün) und Hospitalisierungswahrscheinlichkeit↓↓ <sup>(††)</sup>                                                                                                                                                                                                                                                                                                 |
| Steiner et al. (2015)<br>CH                   | Einfluss<br>MTS-Klassifizierung auf <i>Hospitalisierung<br/>(intensivspezifisch), Intensivpflegebedürftigkeit, Mortalität</i>                                                                                                                                                     | prospektive Kohortenstudie<br>n=2407                               | Priorisierung↑ und Mortalitätsrisiko↑ <sup>(‡‡)</sup><br>Vorhersagevalidität↑ für 30d-Mortalität <sup>(††)</sup><br>Vorhersagevalidität↓ der 72h-Mortalität <sup>(††)</sup><br>Hospitalisierungswahrscheinlichkeit↑ bei Priorisierung↑ (Kat. orange und rot) <sup>(‡‡)</sup><br>Vorhersagevalidität↑ für Intensivpflegebedürftigkeit <sup>(††)</sup>                                                                                                 |
| Storm-Versloot et al.<br>(2014)<br>NED        | Einfluss der Implementierung des MTS auf <i>Wartezeit,<br/>Behandlungszeit, Aufenthaltsdauer in der Notfallambulanz,<br/>Patient:innenzufriedenheit</i> ; Zusammenhang MTS-<br>Klassifizierung und <i>Wartezeit, Behandlungszeit,<br/>Aufenthaltsdauer in der Notfallambulanz</i> | prospektive Prä-Post-Studie<br>n=1808                              | Wartezeit↑ <sup>(††)</sup> und Behandlungszeit↓ <sup>(††)</sup> nach Implementierung des MTS<br>Aufenthaltsdauer↑↓ in Notfallambulanz nach Implementierung des MTS <sup>(†)</sup><br>Patient:innenzufriedenheit↑↓ nach der Implementierung des MTS <sup>(†)</sup><br>Priorisierung↑ und Behandlungszeit↑ <sup>(‡‡)</sup><br>Priorisierung↑ und Wartezeit↓ <sup>(‡‡)</sup><br>Priorisierung↑ und Aufenthaltsdauer↓ in Notfallambulanz <sup>(‡‡)</sup> |
| Van Veen et al.<br>(2011)<br>NED              | Einfluss<br>MTS-Klassifizierung auf <i>Hospitalisierungswahrscheinlichkeit</i> bei pädiatrischen Patient:innen                                                                                                                                                                    | prospektive<br>Beobachtungsstudie<br>n=5425                        | Hospitalisierungswahrscheinlichkeit↑↓ und Priorisierung↑↓ <sup>(†)</sup>                                                                                                                                                                                                                                                                                                                                                                             |
| Paiva et al.<br>(2011)<br>POR                 | Zusammenhang<br>MTS-Klassifizierung und <i>Mortalität</i>                                                                                                                                                                                                                         | krankenhauszentrierte,<br>retrospektive<br>Kohortenstudie<br>n=176 | Mortalität↑ bei Priorisierung Kat. rot vs. Kat. orange <sup>(††)</sup><br>Priorisierung↑ und Mortalitätsrisiko↑ <sup>(‡‡)</sup>                                                                                                                                                                                                                                                                                                                      |

| Autor*in (Jahr)<br><i>Land</i>      | Ziel                                                                                              | Studiendesign,<br>Stichprobe                 | Ergebnisse                                                                                                                                                                |
|-------------------------------------|---------------------------------------------------------------------------------------------------|----------------------------------------------|---------------------------------------------------------------------------------------------------------------------------------------------------------------------------|
| Martins et al. (2009)<br><i>POR</i> | Zusammenhang<br>MTS-Klassifizierung und<br><i>Hospitalisierungswahrscheinlichkeit, Mortalität</i> | retrospektive,<br>Kohortenstudie<br>n=321539 | Mortalität↑ bei Priorisierung Kat. rot vs. Kat. orange <sup>(††)</sup><br>Hospitalisierungswahrscheinlichkeit↑ bei Priorisierung Kat. rot vs. Kat. orange <sup>(††)</sup> |
| [‡‡] signifikanter Zusammenhang     |                                                                                                   | (††) signifikanter Unterschied               | ↑ hoch    ↑↑ am höchsten                                                                                                                                                  |
| [‡] kein signifikanter Zusammenhang |                                                                                                   | (†) kein signifikanter Unterschied           | ↓ niedrig    ↓↓ am niedrigsten                                                                                                                                            |
